# $\alpha$ -Synuclein upregulates bim-mediated apoptosis by negatively regulating endogenous GCN5

Shofiul Azam<sup>1</sup>, In-Su Kim<sup>2</sup>, Dong-Kug Choi<sup>1,2</sup>

<sup>1</sup>Department of Applied Life Science, Graduate School, BK21 Program, Konkuk University, Chungju 27478, Korea

<sup>2</sup>Department of Biotechnology, College of Biomedical and Health Science, Research Institute of Inflammatory Disease (RID), Konkuk University, Chungju 27478, Korea

**Correspondence to:** Dong-Kug Choi; email: [choidk@kku.ac.kr](mailto:choidk@kku.ac.kr)

**Keywords:** synucleinopathy, Parkinson's disease, histone acetyltransferase,  $\alpha$ -synuclein

**Received:** August 25, 2022

**Accepted:** October 14, 2022

**Published:** October 27, 2022

**Copyright:** © 2022 Azam et al. This is an open access article distributed under the terms of the [Creative Commons Attribution License](https://creativecommons.org/licenses/by/3.0/) (CC BY 3.0), which permits unrestricted use, distribution, and reproduction in any medium, provided the original author and source are credited.

## ABSTRACT

$\alpha$ -synuclein ( $\alpha$ S) is a  $\beta$ -sheet intracellular protein that has been implicated as a major pathological hallmark of Parkinson's disease (PD). Several studies have shown that overexpression of  $\alpha$ S causes dopaminergic cell loss; however, the role of  $\alpha$ S in apoptosis remains not fully known. Therefore, this study aims to address the mechanisms of the  $\alpha$ S overexpression model in apoptosis and to its correlation with PD pathogenesis. Here, we used a human  $\alpha$ S ( $h\alpha$ S) plasmid to characterize the role of ectopic  $\alpha$ S in neuronal apoptosis in sporadic PD *in vitro*. We found that overexpression of  $\alpha$ S transcriptionally upregulated Bim-mediated apoptosis in neuronal SH-SY5Y cells. Interestingly,  $\alpha$ S overexpression inhibited general control non-depressible 5 (GCN5), a histone acetyltransferase (HAT), and promoted transcriptional upregulation of Bim. Consequently, co-overexpression of GCN5 in the  $\alpha$ S overexpressed model showed a reversal of  $\alpha$ S toxicity in neuronal cells. These *in vitro* findings support the hypothesis of  $\alpha$ S-mediated histone deacetylation and dopaminergic neuronal loss in PD. Moreover, our study indicates that therapeutic activation/homeostasis of GCN5 may benefit PD and other  $\alpha$ -synucleinopathies.

## INTRODUCTION

Parkinson's disease (PD) is the second most prevalent disease among people over 65 years of age, affecting at least 1% of the population [1, 2]. Lewy pathology,  $\alpha$ -synuclein-rich proteinaceous cytoplasmic inclusions, is a histological hallmark of clinical PD and other synucleinopathy [3–5].  $\alpha$ -synuclein ( $\alpha$ S) is a cytosolic intracellular protein [6] that is normally expressed at the presynaptic terminals. Several studies have noted nuclear localization of this protein in experimental models [7–9] and in patients with multiple system atrophy, a distinct form of synucleinopathy [10, 11]. One study has shown the physiological role of  $\alpha$ S at the nucleus and mechanistically reported the role of the histone- $\alpha$ S complex in neurotoxicity [12]. However, there is a fundamental question that remains

unanswered: does  $\alpha$ S form any complex with endogenous histone acetyltransferase (HAT).

The kinetic balance between HAT and histone deacetylase (HDAC) activities regulates the steady acetylation of histone and non-histone proteins [13], resulting in cellular homeostasis. This balance also regulates cellular fate [14] by regulating different gene expressions and repression. Loss of neuronal homeostasis by losing the HAT: HDAC balance has been viewed as being related to neuronal apoptosis and neurodegeneration [15, 16]. In addition, loss of acetylation is also related to the loss of important HAT members—for example, the general control non-repressible 5 (GCN5) [17]—resulting in apoptosis. GCN5 was the first identified enzyme with intrinsic HAT activities that is also capable of linking histone

acetylation to transcriptional regulation [18, 19]. Supporting the neuroprotective role of GCN5, a study showed that GCN5-mediated acetylation of peroxisome proliferator-activated receptor  $\gamma$  coactivator-1 $\alpha$  (PGC-1 $\alpha$ ), protects neuronal cells against MPP<sup>+</sup>-induced oxidative stress [20]. GCN5<sup>-/-</sup> mice died during embryogenesis due to a combination of excessive apoptosis [21, 22] and loss of GCN5 transcriptionally upregulated BH3-only protein (Bim) and caspase-dependent neuronal apoptosis [17].

Although the histone- $\alpha$ S complex formation and its role in neurotoxicity are known, the interaction of  $\alpha$ S with GCN5 has yet to be discovered. In this study, we investigated the involvement of GCN5 in synucleinopathy. To do so, we used (human)  $\alpha$ S-transfected neuroblastoma (SH-SY5Y) cells, in which  $\alpha$ S disrupted cell viability. Further, we found that overexpression of  $\alpha$ S interferes with the GCN5 basal level, which we predicted could play a critical role in  $\alpha$ S-mediated neurotoxicity. Our effort to understand  $\alpha$ S-GCN5 interaction has found important pathogenesis of  $\alpha$ -synucleinopathy and PD.

## RESULTS

### Overexpression of $\alpha$ S reduces cell viability

Several studies indicated that ectopic  $\alpha$ S is a major hallmark of neuronal cell death in PD pathology [23] and that  $\alpha$ S overexpression promotes cell death via changing sub-cellular localization [12]. Therefore, we investigated whether our  $\alpha$ S (human) plasmid overexpression (Figure 1A) affected the viability of SH-SY5Y neuroblastoma (Figure 1B, 1C). We used DNA fragmentation (DNA ladder) and DAPI staining assay of transiently transfected vectors or  $\alpha$ S plasmids. After 48 hours of transfection,  $\alpha$ S showed significant

chromatin aggregation and increased DNA fragmentation.  $\alpha$ S at the nucleus masks H3 histone and inhibits H3 activities at the chromatin level [12]. Also, overexpression of sporadic or familial (A53T and A30P)  $\alpha$ S phosphorylates at ser129 reduces cell viability via aggregation [24]. Corroborating previous findings, our data indicate that ectopic  $\alpha$ S regulates neuronal cell fate.

### Overexpression of $\alpha$ S activates bim-mediated apoptotic signaling

The BH3-only protein Bim is a pro-apoptotic protein that has been previously shown to upregulate during apoptosis. Bim induces apoptosis by binding to Bcl-2 or Bcl-xl and antagonizes their anti-apoptotic functions. In the  $\alpha$ S<sup>+/+</sup> model, both the mRNA and protein levels of Bim increased substantially (Figure 2A, 2B). A previous study demonstrated that Bim genes are transcriptionally regulated by Egr-1 and E2F1 [17, 25]. Therefore, we tested the impact of  $\alpha$ S overexpression on Bim transcriptional factors E2F1 and Egr-1 (Figure 2A, 2B). We found that, in both mRNA and protein levels, overexpression of  $\alpha$ S significantly upregulated E2F1 but not Egr-1. This was further corroborated by co-immunoprecipitating both transcription factors in non-transfected SH-SY5Y cells (Figure 2C). Immunoprecipitation showed that anti-E2F1 endogenously precipitated anti- $\alpha$ S more intensely than anti-Egr-1. Moreover, Bim is an upstream regulator of the caspase-3-mediated apoptotic signaling pathway.  $\alpha$ S overexpression increases the Bim level that inhibits Bcl-2, frees Bax, and activates caspase-3 (Figure 2D).

### $\alpha$ S Inhibits endogenous GCN5 expression

A recent study reported that GCN5 transcriptionally regulates Bim and downstream caspase-3 activation

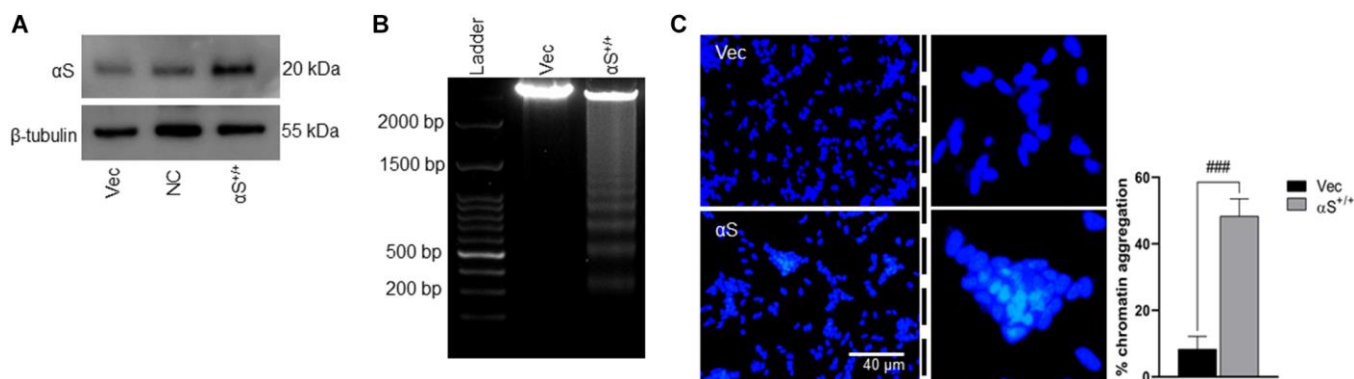

**Figure 1.  $\alpha$ S overexpression and toxicity.** (A) SH-SY5Y neuroblastoma cells were transfected by human  $\alpha$ S plasmid. (B) SH-SY5Y cells were transiently transfected by  $\alpha$ S, and post-transfection incubated for an additional 24 h and subjected to test cell viability by DNA laddering and nucleic staining by DAPI (C) where the whitish inclusions (cropped) indicated apoptotic cells with nuclear pyknosis; the pyknosis rate (% chromatin aggregation) was calculated by the scoring percent of cells with nuclear pyknosis in total DAPI-stained cells (scale bar = 40  $\mu$ m). ### $p$  < 0.001 compared between vector (vec) vs.  $\alpha$ S<sup>+/+</sup>.

[17]. Though  $\alpha$ S interacts and inhibits neuronally expressed acetyltransferase enzymes CBP, p300, and P/CAF [12, 26], it is generally unknown whether  $\alpha$ S and GCN5 endogenously interact. To confirm endogenous binding, we co-immunoprecipitated GCN5 in non-transfected SH-SY5Y cells and probed anti- $\alpha$ S (Figure 3A). Furthermore, we evaluated the impact of  $\alpha$ S overexpression on endogenous GCN5 expression in neuronal SH-SY5Y (Figure 3B) and non-neuronal HEK293T cells (Figure 3C). A significant decrease, compared to usual, in GCN5 expression in  $\alpha$ S<sup>+/+</sup> indicates that GCN5 may be involved in  $\alpha$ S-mediated Bim upregulation.

### Inhibition of GCN5 triggers $\alpha$ S overexpression-mediated bim upregulation

As we found  $\alpha$ S<sup>+/+</sup> inhibits GCN5 and regulates proapoptotic Bim, we tested the hypothesis that GCN5 is involved in Bim's transcriptional regulation. To test this

hypothesis, we co-immunoprecipitated GCN5 and E2F1 and probed anti- $\alpha$ S (Figure 4A). Since the loss of GCN5 upregulates both transcription factors of Bim [17], our results indicate that ectopic  $\alpha$ S interacts and inhibits GCN5 and that this upregulates the E2F1 level. Next, we checked whether the knockdown of GCN5 by siRNA affects endogenous  $\alpha$ S expression (Figure 4B); however, no significant changes were observed. siGCN5 substantially upregulates Bim, Egr-1, and E2F1 levels but decreases Bcl2 expression in neuronal cells (Figure 4C). These data suggest that GCN5 could be a potential target to reduce neuronal apoptosis in PD and other synucleinopathy.

### Targeting GCN5 ameliorates $\alpha$ S-mediated apoptosis

Until now, this study has indicated that  $\alpha$ S overexpression dismantles GCN5 homeostasis, which triggers apoptosis in neuronal cells. Therefore, we hypothesized that GCN5 homeostasis by co-activation

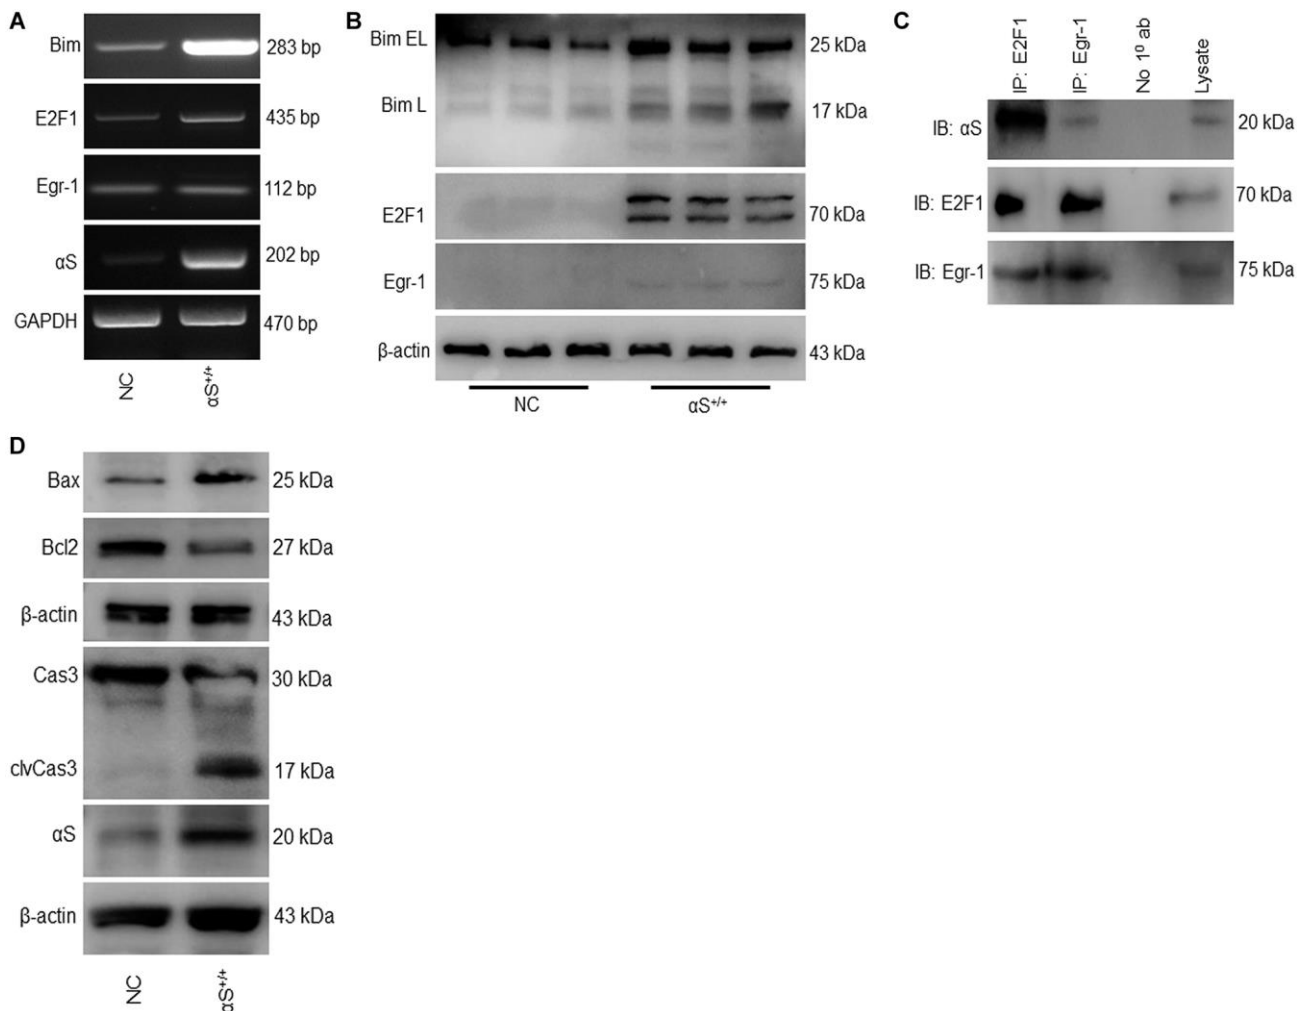

**Figure 2. Overexpression of  $\alpha$ S promotes Bim-mediated apoptotic pathway.** (A) mRNA and (B) protein expression of Bim and its transcription factors in non-transfected cells (NC) and transfected ( $\alpha$ S<sup>+/+</sup>) cells. (C) SH-SY5Y cells were co-immunoprecipitated by anti-E2F1 and anti-Egr1 or A/G beads only (No 1<sup>o</sup> ab) as negative control and probed for anti- $\alpha$ S. (D) Protein expression of apoptotic markers.

could benefit PD patients by ameliorating apoptosis. First, we tested whether GCN5 overexpression (oeGCN5) modulates  $\alpha$ S endogenous levels (Figure 5A) and found that oeGCN5 downregulated endogenous  $\alpha$ S expression. Later, we co-overexpressed  $\alpha$ S and GCN5 ( $\alpha$ S+GCN5) in SH-SY5Y cells (Figure 5B) and tested for an apoptotic marker expression (Figure 5C). The co-overexpression of  $\alpha$ S and GCN5 were found to substantially reduce transcriptional upregulation of Bim and improve Bcl2 levels, which reduced caspase-3 activation. Subsequently, co-overexpression downregulated neuronal cell death (Figure 5D).

## DISCUSSION

Multiplications of the *SNCA* gene locus showed autosomal dominant PD, where gene dose was the determinant of severity and onset. This indicates that  $\alpha$ S mutations, which alter protein output, are not the determinant of  $\alpha$ S pathology—wild-type  $\alpha$ S overexpression could also cause the disease. Moreover, overexpression of  $\alpha$ S, due to either increased expression

or reduced clearance, is a common feature of a sporadic disease condition. Since the first identification of  $\alpha$ S, most related studies have focused on  $\alpha$ S roles in nerve terminals [27, 28]; however, a definitive role is yet to be found. Nevertheless, some studies have shown that the nuclear localization of  $\alpha$ S [7, 8, 12, 29] contributes to its cytotoxic role [12]. In this study, we observed  $\alpha$ S immunoreactivity with the important HAT GCN5. We also found that  $\alpha$ S suppressed GCN5 endogenous levels in dopaminergic neuronal cells and loss of GCN5 promoted Bim-mediated apoptotic signaling.

Bim is a major regulator of the intrinsic apoptosis pathway under both physiological and pathological conditions. Pro-activities and expression of Bim are tightly regulated by several transcription factors, including Fox3a, E2F1, c-Myc, and Egr-1 [30]. Ectopic E2F1 has shown upregulation of Bim expression and neuronal apoptosis [31]. Also, histone deacetylases (HDAC) have been observed targeting the transcription factor E2F1 in the hyperactivation of Bim and apoptosis [32].  $\alpha$ S plays as critical a role as HDAC, which we also

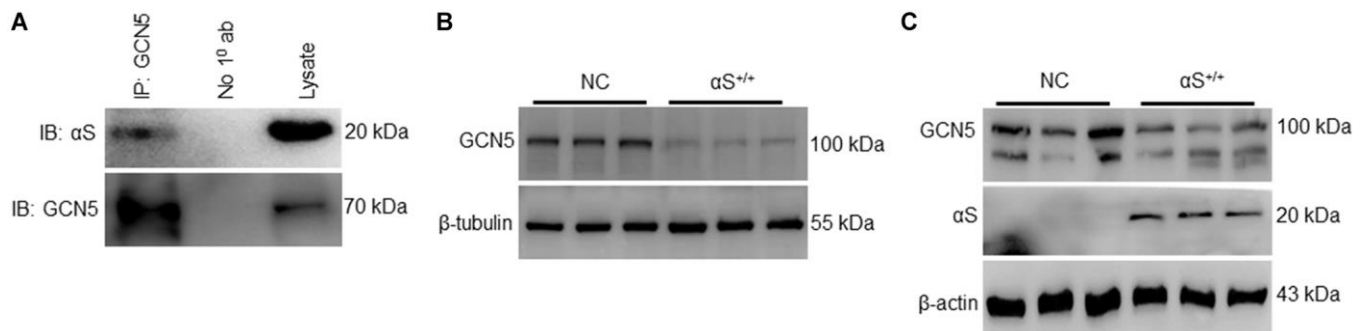

**Figure 3.  $\alpha$ S<sup>+/+</sup> inhibiting endogenous GCN5 and inhibiting GCN5 expression.** (A) co-immunoprecipitation of GCN5 in wildtype SH-SY5Y and probed for anti- $\alpha$ S. Endogenous protein expression of GCN5 in neuronal SH-SY5Y cells (B) and non-neuronal HEK293T cells (C) transfected ( $\alpha$ S) or NC.

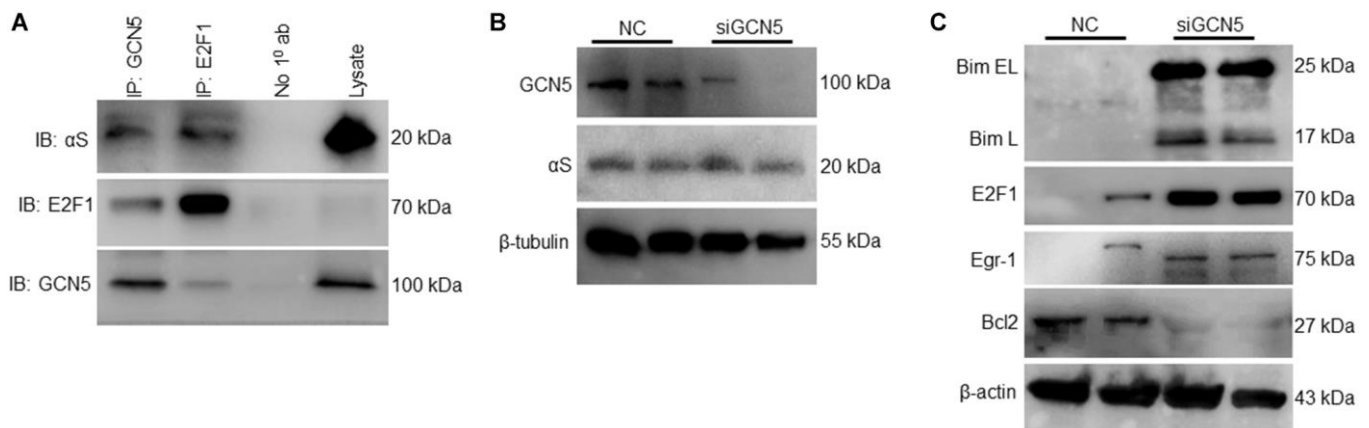

**Figure 4. Inhibition of GCN5 by  $\alpha$ S triggering Bim expression.** (A) Co-immunoprecipitation of GCN5 and E2F1 in neuronal SH-SY5Y cells and probed for anti- $\alpha$ S. (B) GCN5 siRNA was used to knockdown GCN5 in SH-SY5Y cells; protein lysates were collected 24 h after siGCN5 induction and probed for anti-GCN5 and anti- $\alpha$ S. (C) Protein expression of apoptotic and anti-apoptotic markers.

demonstrated in the present work. Overexpression of  $\alpha$ S activated E2F1 and significantly upregulated Bim expression. In addition, Bim could induce apoptosis directly or indirectly by neutralizing anti-apoptotic Bcl2 and promoting Bax [30]. This indicates that  $\alpha$ S overexpression upregulates Bim levels, thus binding Bcl2 and masking Bcl2 anti-apoptotic activities.

In the nucleus,  $\alpha$ S inhibits H3 histone acetylation [12], promoting neurotoxicity. HAT members—for example, GCN5—are important for maintaining the precious HAT: HDAC balance. Loss of the basal level of HAT might promote histone deacetylation, thus impairing acetylation homeostasis. Moreover, a recent study characterized the anti-apoptotic role of GCN5 [17, 20], which also indicates that inhibition of GCN5 activities could trigger apoptosis. However, until this study, there have been no reports of the direct inhibition of GCN5 by  $\alpha$ S. In this study, we found that GCN5 and  $\alpha$ S have endogenous protein-protein interaction and that  $\alpha$ S<sup>+/+</sup> downregulates the basal level of GCN5. Several studies have reported that HAT members modulate neuronal fate: for example, enhanced p3000 HAT activity upregulated PKC $\delta$ -mediated neuronal apoptosis [26], and increased Tip60 HAT activities induced APP-mediated apoptosis in Alzheimer's disease [33]. While the loss of HAT activities promotes apoptosis, loss of

the CREB-binding protein (CBP) HAT activity promotes caspase-6-mediated apoptosis [34], and inhibition by MB-3 or knockdown of GCN5 induces Bim-transcription and apoptosis [17]. Our findings indicate that, among the other neurotoxic pathways of  $\alpha$ S, GCN5 activity inhibition is involved. We also correlated that loss of GCN5 via  $\alpha$ S overexpression enhanced transcription factor E2F1 and activated Bim. Furthermore,  $\alpha$ S downregulates anti-apoptotic Bcl-2, frees Bim protein that activates Bax, and permeabilizes the mitochondrial membrane, resulting in caspase-dependent apoptosis [35].

$\alpha$ S has been reported to inhibit multiple HAT activities, but there has been no previous research on GCN5 activities in this context. However, loss of GCN5, but not p300 and Tip60, was found to upregulate apoptosis [17]. Here, we report a protective role of GCN5 in  $\alpha$ -synucleinopathy. Co-overexpression of GCN5 rescues neuronal cells via downregulating Bim transcription and reversing caspase-3-mediated apoptosis.

In conclusion, we showed a new role of  $\alpha$ S overexpression in apoptosis. We also found that  $\alpha$ S interacts with and inhibits GCN5 and loss of GCN5 promotes Bim-mediated apoptosis in neuronal cells (Figure 6). Promisingly, HDAC inhibitors have shown

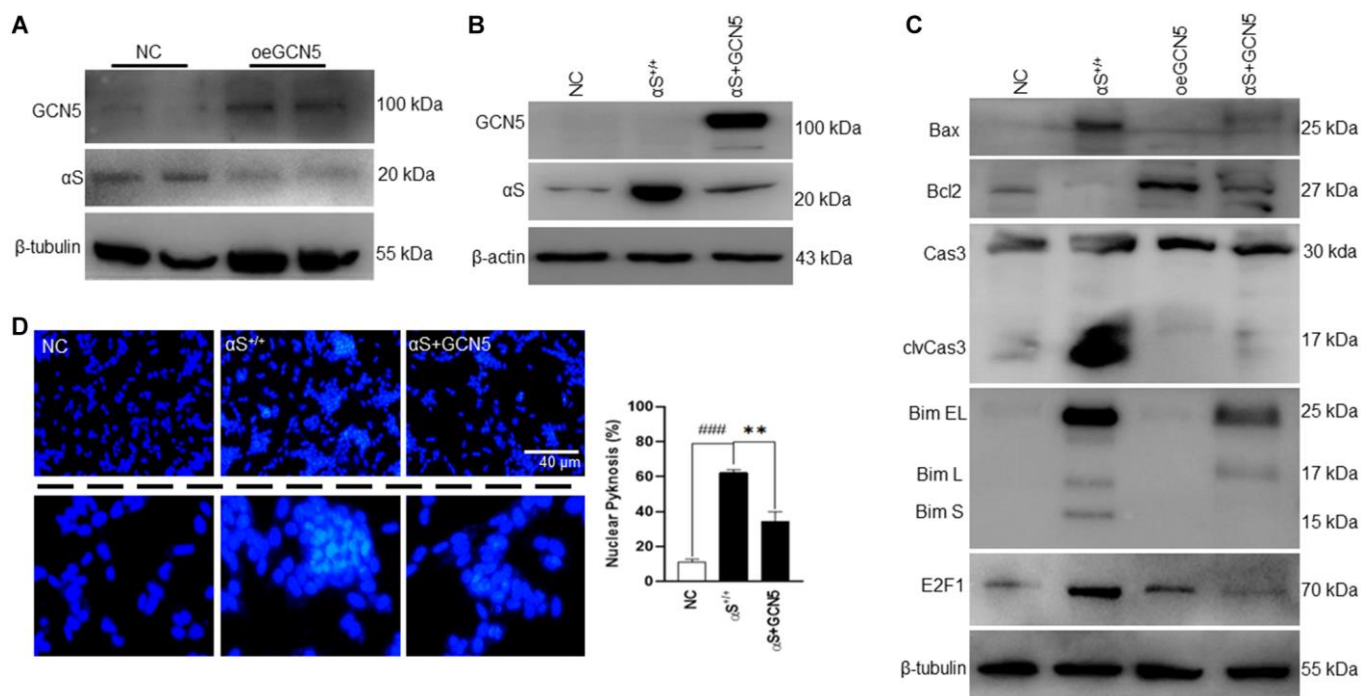

anti-apoptotic activities in many neurodegenerative diseases by preventing histone deacetylation. Yet, we found a new pathway in which the development of the GCN5 activator would build HAT: HDAC homeostasis and could reverse neuronal apoptosis in Parkinson's disease pathogenesis. Since  $\alpha$ S acts in the nucleus to promote neurotoxicity, mostly by interfering with histone acetylation and HAT member activities, our findings suggest that the development of GCN5-dependent therapeutics might benefit PD and other synucleinopathy.

## METHODS

### Cell culture and treatment

Human neuroblastoma SH-SY5Y cells were obtained from the American Type Culture Collection (ATCC; Manassas, VA, USA). The neuroblastoma cells were cultured in DMEM/F12 (1:1) supplemented with 100 U/mL penicillin/streptomycin and 10% (v/v) inactivated FBS in an incubator with the conditions maintained at

37°C and 5% CO<sub>2</sub>. The cells were trypsinized (0.05% trypsin-EDTA) after reaching 80–90% confluence for sub-culture, and the media was replaced every 2 days. Each experiment was conducted at least three times from three consecutive passages for statistical analysis.

### Lentiviral transfection

The lentiviral plasmid *SNCA* (pLenti-GIII-CMV-C-term-HA; cat# LV315044), *KAT2A* (pLenti-GIII-CMV-C-term-HA; cat# LV194350) and empty vector (pLenti-III-Blank; cat# LV587) were obtained from Applied Biological Materials Inc. (Crestwood Place, BC, Canada). After transforming into *E. coli* (DH5 $\alpha$ ), the large colonies were picked for further amplification and purification using the PureLink plasmid filter kit (Thermo Fisher Scientific, V.A., Lithuania), as per the manufacturer's instructions. The empty vector served as a control. Amplified and purified plasmids were infected into 70–80% confluent SH-SY5Y cells using a Lipofectamine 3000 (cat# L3000015; Thermo Fisher Scientific) reagent. Post-transfection, cells were kept for

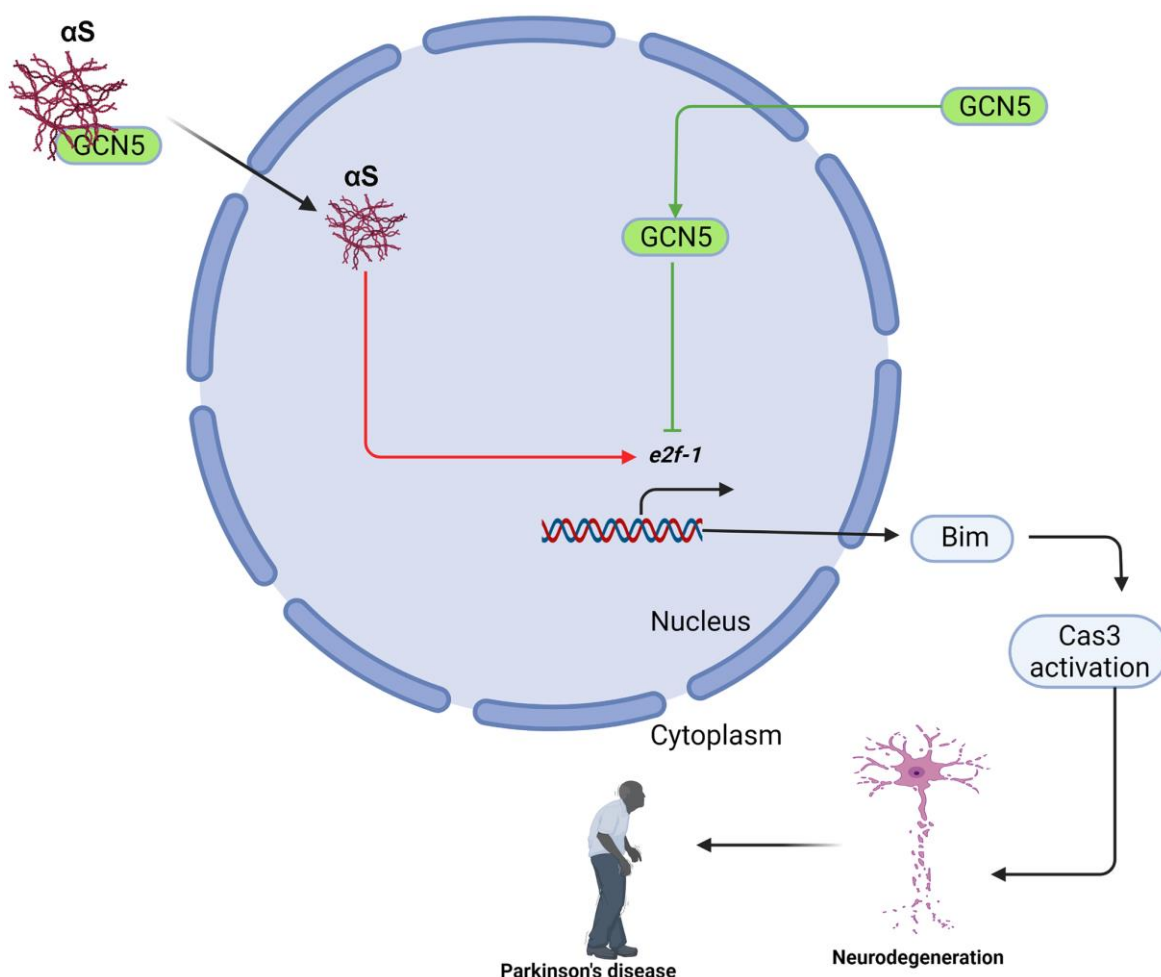

Figure 6. Schematic presentation of  $\alpha$ S-GCN5 role in neuronal cell apoptosis.

48 hours and then treated with 0.75–1 µg/ml puromycin to select stably transfected cells. The stably transfected αS, GCN5, and Vec were subjected to WB and reverse transcription-PCR (RT-PCR) for further analysis.

### Reverse transcription-PCR (RT-PCR)

The total RNA was extracted and isolated using the TRIzol reagent (Invitrogen, Carlsbad, CA, USA) as described by the supplier. We used the following primers specific for:

- Bim (forward 5'-CTACCAGATCCCCACTTTTC-3', reverse 5'-GCCCTCCTCGTGTAAGTCTC-3');
- E2F1 (forward 5'-GACTGTGACTTTGGGGACT-3', reverse 5'-TGTTACCTTCATTCCC-3');
- Egr-1 (forward 5'-CGAGCGAACAACCC TACGAGC-3', reverse 5'-GAGGCAGAGGAAGA CGATGAAGC-3');
- αS (forward 5'-AGTGGCTGAGAAGACCAAAG-3', reverse 5'-GTCAGGATCCACAGGCATATC-3');
- GCN5 (forward 5'-AGCGGTTGTTCCCA GCACCC-3', reverse 5'-GACAGCACAGAAGA CAATCT-3');
- GAPDH (forward 5'-GCAAAGTGGAGATTG TTGCCATC-3' and reverse 5'-CATATTTCTC GTGGTTCACACCC-3').

Photos were taken in a Davinch-K Gel Imaging System (MC2000/CG550, Youngin Lab Plus Co., the Republic of Korea).

### Western blot analysis

The cells were washed twice with cold PBS and subjected to lyse using a lysis buffer (1× RIPA lysis buffer containing a protease and phosphatase inhibitor (1:1) cocktail). Whole mixtures were centrifuged at 14,000 rpm at 4°C for 15 minutes, and the supernatants were collected carefully without disturbing the pellets. The total protein obtained from cell lysates was quantified using a DC™ protein assay kit (Bio-Rad, USA) according to manufacturer instructions. Equal amounts of protein (20 µg) were separated electrophoretically using 8–15% sodium dodecyl sulfate-polyacrylamide electrophoresis (SDS-PAGE) gel and then transferred onto polyvinylidene-difluoride (PVDF) membranes (Millipore, Bedford, MA, USA). The membranes were incubated at room temperature for 1 hour with 3% bovine serum albumin in Tris-buffered saline (containing 0.1% Tween 20 buffer) to prevent nonspecific binding. The blots were then incubated overnight at 4°C with specific primary antibodies, including anti-Caspase3 (#H-277; Santa Cruz Biotechnology), anti-clvCaspase3 (#9661; cell signaling technology), anti-alpha-synuclein (#ab212184; Abcam),

anti-alpha-synuclein LB509 (#ab27766; Abcam), anti-alpha-synuclein (211) (#sc-12767; Santa Cruz Biotechnology), anti-EGR-1 (#4154; cell signaling technology), anti-E2F1 (#3742; cell signaling technology), anti-Bim (#2819; cell signaling technology), anti-GCN5 (#sc-365321; Santa Cruz Biotechnology), anti-GCN5 (#MA45-14886; Invitrogen) anti-Bcl-2 (#N-19; Santa Cruz Biotechnology), anti-Lamin B1 (#12586; cell signaling technology), anti-Ac Histone H3 (#sc-56616; Santa Cruz Biotechnology), anti-Histone H3 (#sc-517576; Santa Cruz Biotechnology), anti-Ac Lys (#AB3879; Sigma-Aldrich) at 1:1000, anti-β-actin (#C4; Santa Cruz Biotechnology), and anti-β-tubulin (#2146; cell signaling technology) at 1:5000 concentration. Next, each blot was incubated at room temperature with either an anti-mouse or anti-rabbit (1:10,000) secondary antibody. The blots were visualized with an enhanced chemiluminescence detection system (LAS 500; GE Healthcare Bio-Sciences AB, Sweden) per the recommended protocol.

### DAPI staining

SH-SY5Y or transfected cells were grown to a confluency of 70–80% then washed with cold PBS once, followed by fixation with 4% cold PFA for 15 minutes at room temperature. After discarding PFA, cells were washed twice and permeabilized with 0.1% Triton X-100 for 10 minutes at room temperature. Cells were stained with DAPI (2 µg/ml) for 10 minutes at room temperature and images were immediately captured using a Nikon Eclipse Ts2R fluorescence microscopy system and were processed by NIS-Elements BR-2.01.00 software (which came with the instrument).

### RNA interference

siRNA of GCN5 (#sc-37946; Santa Cruz Biotechnology) was used. The interference efficiency was detected by comparing siRNAs with the normal control (NC). Each siRNA was transfected into SH-SY5Y cells by RNAiMax (Invitrogen) according to the manufacturer's protocol. Forty-eight hours after transfection, cell lysates were harvested and processed for WB to detect the expression of these proteins.

### Co-immunoprecipitation

The SH-SY5Y cells were seeded at  $5 \times 10^5$  density for 48 hours in a P100 plate and lysed in a non-denaturing RIPA buffer for 1 hour of incubation at 4°C on a wheel. After centrifugation, the supernatant was quantified with a DC™ protein assay kit (Bio-Rad, USA), and 0.6 mg of total protein extract was added to 50 µL of A/G agarose containing anti-GCN5, anti-E2F1, and anti-Egr-1

O/N at 4°C (rotation). The next day, the same binding buffer was used to perform four washes by centrifugation at 11,000 × g for 1 minute. The precipitated agarose was finally boiled and used for a western blot with the respective antibodies.

### Statistical analysis

Statistical analyses were performed using GraphPad Prism (version 8.0.1; La Jolla, CA, USA) software. Data are represented as means ± SEM (standard error mean) of the three independent experiments. Student's two-tailed *t*-test was used for comparison of the two different groups, and a one-way ANOVA, followed by Sidak's multiple comparisons, was used for analysis more than two groups. A *p*-value of <0.05 was considered statistically significant.

### Data availability

The datasets generated and/or analyzed during the current study are publicly available upon acceptance of this manuscript.

### AUTHOR CONTRIBUTIONS

DKC supervised this work; SA did experiments, collected data, and wrote the manuscript; DKC, SA, and ISK reviewed and corrected the final manuscript. Finally, all authors have read and agreed to publish this version of the manuscript.

### CONFLICTS OF INTEREST

The authors declare no conflicts of interest related to this study.

### FUNDING

This work was supported by the National Research Foundation of Korea (NRF) grant funded by the Korean government (MSIT) (NRF-2020R1A2B5B02002032).

### REFERENCES

1. Pankratz N, Foroud T. Genetics of Parkinson disease. *NeuroRx*. 2004; 1:235–42. <https://doi.org/10.1602/neurorx.1.2.235> PMID:15717024
2. Azam S, Haque ME, Balakrishnan R, Kim IS, Choi DK. The Ageing Brain: Molecular and Cellular Basis of Neurodegeneration. *Front Cell Dev Biol*. 2021; 9:683459. <https://doi.org/10.3389/fcell.2021.683459> PMID:34485280
3. Spillantini MG, Schmidt ML, Lee VM, Trojanowski JQ, Jakes R, Goedert M. Alpha-synuclein in Lewy bodies. *Nature*. 1997; 388:839–40. <https://doi.org/10.1038/42166> PMID:9278044
4. Surmeier DJ, Obeso JA, Halliday GM. Selective neuronal vulnerability in Parkinson disease. *Nat Rev Neurosci*. 2017; 18:101–13. <https://doi.org/10.1038/nrn.2016.178> PMID:28104909
5. Gonzalez-Rodriguez P, Zampese E, Surmeier DJ. Selective neuronal vulnerability in Parkinson's disease. *Prog Brain Res*. 2020; 252:61–89. <https://doi.org/10.1016/bs.pbr.2020.02.005> PMID:32247375
6. Hijaz BA, Volpicelli-Daley LA. Initiation and propagation of α-synuclein aggregation in the nervous system. *Mol Neurodegener*. 2020; 15:19. <https://doi.org/10.1186/s13024-020-00368-6> PMID:32143659
7. Takahashi M, Kanuka H, Fujiwara H, Koyama A, Hasegawa M, Miura M, Iwatsubo T. Phosphorylation of alpha-synuclein characteristic of synucleinopathy lesions is recapitulated in alpha-synuclein transgenic *Drosophila*. *Neurosci Lett*. 2003; 336:155–8. [https://doi.org/10.1016/s0304-3940\(02\)01258-2](https://doi.org/10.1016/s0304-3940(02)01258-2) PMID:12505616
8. McLean PJ, Ribich S, Hyman BT. Subcellular localization of alpha-synuclein in primary neuronal cultures: effect of missense mutations. *J Neural Transm Suppl*. 2000; 53–63. [https://doi.org/10.1007/978-3-7091-6284-2\\_5](https://doi.org/10.1007/978-3-7091-6284-2_5) PMID:11128613
9. Miraglia F, Ricci A, Rota L, Colla E. Subcellular localization of alpha-synuclein aggregates and their interaction with membranes. *Neural Regen Res*. 2018; 13:1136–44. <https://doi.org/10.4103/1673-5374.235013> PMID:30028312
10. Li JY, Henning Jensen P, Dahlström A. Differential localization of alpha-, beta- and gamma-synucleins in the rat CNS. *Neuroscience*. 2002; 113:463–78. [https://doi.org/10.1016/s0306-4522\(02\)00143-4](https://doi.org/10.1016/s0306-4522(02)00143-4) PMID:12127102
11. Nishie M, Mori F, Yoshimoto M, Takahashi H, Wakabayashi K. A quantitative investigation of neuronal cytoplasmic and intranuclear inclusions in the pontine and inferior olivary nuclei in multiple system atrophy. *Neuropathol Appl Neurobiol*. 2004; 30:546–54. <https://doi.org/10.1111/j.1365-2990.2004.00564.x> PMID:15488031



12. Kontopoulos E, Parvin JD, Feany MB. Alpha-synuclein acts in the nucleus to inhibit histone acetylation and promote neurotoxicity. *Hum Mol Genet.* 2006; 15:3012–23.  
<https://doi.org/10.1093/hmg/ddl243>  
PMID:16959795
13. Scott I. Regulation of cellular homeostasis by reversible lysine acetylation. *Essays Biochem.* 2012; 52:13–22.  
<https://doi.org/10.1042/bse0520013>  
PMID:22708560
14. Park JM, Jo SH, Kim MY, Kim TH, Ahn YH. Role of transcription factor acetylation in the regulation of metabolic homeostasis. *Protein Cell.* 2015; 6:804–13.  
<https://doi.org/10.1007/s13238-015-0204-y>  
PMID:26334401
15. Fessler EB, Chibane FL, Wang Z, Chuang DM. Potential roles of HDAC inhibitors in mitigating ischemia-induced brain damage and facilitating endogenous regeneration and recovery. *Curr Pharm Des.* 2013; 19:5105–20.  
<https://doi.org/10.2174/1381612811319280009>  
PMID:23448466
16. Saha RN, Pahan K. HATs and HDACs in neurodegeneration: a tale of disconcerted acetylation homeostasis. *Cell Death Differ.* 2006; 13:539–50.  
<https://doi.org/10.1038/sj.cdd.4401769>  
PMID:16167067
17. Wu Y, Ma S, Xia Y, Lu Y, Xiao S, Cao Y, Zhuang S, Tan X, Fu Q, Xie L, Li Z, Yuan Z. Loss of GCN5 leads to increased neuronal apoptosis by upregulating E2F1- and Egr-1-dependent BH3-only protein Bim. *Cell Death Dis.* 2017; 8:e2570.  
<https://doi.org/10.1038/cddis.2016.465>  
PMID:28125090
18. Nagy Z, Tora L. Distinct GCN5/PCAF-containing complexes function as co-activators and are involved in transcription factor and global histone acetylation. *Oncogene.* 2007; 26:5341–57.  
<https://doi.org/10.1038/sj.onc.1210604>  
PMID:17694077
19. Haque ME, Jakaria M, Akther M, Cho DY, Kim IS, Choi DK. The GCN5: its biological functions and therapeutic potentials. *Clin Sci (Lond).* 2021; 135:231–57.  
<https://doi.org/10.1042/CS20200986>  
PMID:33443284
20. Fan F, Li S, Wen Z, Ye Q, Chen X, Ye Q. Regulation of PGC-1 $\alpha$  mediated by acetylation and phosphorylation in MPP+ induced cell model of Parkinson's disease. *Aging (Albany NY).* 2020; 12:9461–74.  
<https://doi.org/10.18632/aging.103219>  
PMID:32452827
21. Bu P, Evrard YA, Lozano G, Dent SY. Loss of Gcn5 acetyltransferase activity leads to neural tube closure defects and exencephaly in mouse embryos. *Mol Cell Biol.* 2007; 27:3405–16.  
<https://doi.org/10.1128/MCB.00066-07>  
PMID:17325035
22. Xu W, Edmondson DG, Evrard YA, Wakamiya M, Behringer RR, Roth SY. Loss of Gcn5l2 leads to increased apoptosis and mesodermal defects during mouse development. *Nat Genet.* 2000; 26:229–32.  
<https://doi.org/10.1038/79973>  
PMID:11017084
23. Stefanis L.  $\alpha$ -Synuclein in Parkinson's disease. *Cold Spring Harb Perspect Med.* 2012; 2:a009399.  
<https://doi.org/10.1101/cshperspect.a009399>  
PMID:22355802
24. Arawaka S, Sato H, Sasaki A, Koyama S, Kato T. Mechanisms underlying extensive Ser129-phosphorylation in  $\alpha$ -synuclein aggregates. *Acta Neuropathol Commun.* 2017; 5:48.  
<https://doi.org/10.1186/s40478-017-0452-6>  
PMID:28619113
25. Gogada R, Yadav N, Liu J, Tang S, Zhang D, Schneider A, Seshadri A, Sun L, Aldaz CM, Tang DG, Chandra D. Bim, a proapoptotic protein, up-regulated via transcription factor E2F1-dependent mechanism, functions as a prosurvival molecule in cancer. *J Biol Chem.* 2013; 288:368–81.  
<https://doi.org/10.1074/jbc.M112.386102>  
PMID:23152504
26. Jin H, Kanthasamy A, Ghosh A, Yang Y, Anantharam V, Kanthasamy AG.  $\alpha$ -Synuclein negatively regulates protein kinase C $\delta$  expression to suppress apoptosis in dopaminergic neurons by reducing p300 histone acetyltransferase activity. *J Neurosci.* 2011; 31:2035–51.  
<https://doi.org/10.1523/JNEUROSCI.5634-10.2011>  
PMID:21307242
27. Maroteaux L, Campanelli JT, Scheller RH. Synuclein: a neuron-specific protein localized to the nucleus and presynaptic nerve terminal. *J Neurosci.* 1988; 8:2804–15.  
<https://doi.org/10.1523/JNEUROSCI.08-08-02804.1988>  
PMID:3411354
28. Cookson MR. The biochemistry of Parkinson's disease. *Annu Rev Biochem.* 2005; 74:29–52.  
<https://doi.org/10.1146/annurev.biochem.74.082803.133400>  
PMID:15952880
29. Masliah E, Rockenstein E, Veinbergs I, Mallory M, Hashimoto M, Takeda A, Sagara Y, Sisk A, Mucke L. Dopaminergic loss and inclusion body formation in

- alpha-synuclein mice: implications for neurodegenerative disorders. *Science*. 2000; 287:1265–9.  
<https://doi.org/10.1126/science.287.5456.1265>  
PMID:10678833
30. Sionov RV, Vlahopoulos SA, Granot Z. Regulation of Bim in Health and Disease. *Oncotarget*. 2015; 6:23058–134.  
<https://doi.org/10.18632/oncotarget.5492>  
PMID:26405162
31. Wu J, Kharebava G, Piao C, Stoica BA, Dinizo M, Sabirzhanov B, Hanscom M, Guanciale K, Faden AI. Inhibition of E2F1/CDK1 pathway attenuates neuronal apoptosis in vitro and confers neuroprotection after spinal cord injury in vivo. *PLoS One*. 2012; 7:e42129.  
<https://doi.org/10.1371/journal.pone.0042129>  
PMID:22848730
32. Zhao Y, Tan J, Zhuang L, Jiang X, Liu ET, Yu Q. Inhibitors of histone deacetylases target the Rb-E2F1 pathway for apoptosis induction through activation of proapoptotic protein Bim. *Proc Natl Acad Sci U S A*. 2005; 102:16090–5.  
<https://doi.org/10.1073/pnas.0505585102>  
PMID:16243973
33. Pirooznia SK, Sarthi J, Johnson AA, Toth MS, Chiu K, Koduri S, Elefant F. Tip60 HAT activity mediates APP induced lethality and apoptotic cell death in the CNS of a *Drosophila* Alzheimer's disease model. *PLoS One*. 2012; 7:e41776.  
<https://doi.org/10.1371/journal.pone.0041776>  
PMID:22848598
34. Rouaux C, Jokic N, Mbebi C, Boutillier S, Loeffler JP, Boutillier AL. Critical loss of CBP/p300 histone acetylase activity by caspase-6 during neurodegeneration. *EMBO J*. 2003; 22:6537–49.  
<https://doi.org/10.1093/emboj/cdg615>  
PMID:14657026
35. Chen S, Dai Y, Pei XY, Grant S. Bim upregulation by histone deacetylase inhibitors mediates interactions with the Bcl-2 antagonist ABT-737: evidence for distinct roles for Bcl-2, Bcl-xL, and Mcl-1. *Mol Cell Biol*. 2009; 29:6149–69.  
<https://doi.org/10.1128/MCB.01481-08>  
PMID:19805519
